# Supplementary material for: Photoreaction channels of the guanine–cytosine base pair explored by long-range corrected TDDFT calculations
Source: Royal Society of Chemistry journal article supplement (doi:10.1039/c2cp23867e), 2012-01-01
Supplement: c2cp23867e.pdf [file c2cp23867e.pdf]

Photoreaction channels of the guanine–cytosine base pair  
explored by long-range corrected TDDFT calculations

## Electronic Supplementary Information

Shohei Yamazaki\* and Tetsuya Taketsugu

*Department of Chemistry, Faculty of Science, Hokkaido University,  
Sapporo 060-0810, Japan*

E-mail: shohei@mail.sci.hokudai.ac.jp

Table S1: TDDFT/DZP and CC2/SV(P) vertical excitation energies ( $\Delta E$ , eV) and oscillator strengths ( $f$ , in parentheses) for low-lying singlet excited states of GC pair and isolated G and C monomers at the ground-state equilibrium geometry optimized with the LC-BLYP/DZP method.

| State           | LC-BLYP/DZP   |                                  | CAM-B3LYP/DZP |                                     | B3LYP/DZP     |                                                | CC2/SV(P)     |                                  |
|-----------------|---------------|----------------------------------|---------------|-------------------------------------|---------------|------------------------------------------------|---------------|----------------------------------|
|                 | $\Delta E, f$ | Transition                       | $\Delta E, f$ | Transition                          | $\Delta E, f$ | Transition                                     | $\Delta E, f$ | Transition                       |
| GC pair         |               |                                  |               |                                     |               |                                                |               |                                  |
| S <sub>1</sub>  | 5.19 (0.068)  | $1\pi\pi^*$ (G $\rightarrow$ G*) | 4.96 (0.015)  | $1\pi\pi^*$ (G $\rightarrow$ C*)    | 3.35 (0.001)  | $1\pi\pi^*$ (G $\rightarrow$ C*)               | 5.21 (0.051)  | $1\pi\pi^*$ (G $\rightarrow$ G*) |
| S <sub>2</sub>  | 5.32 (0.110)  | $1\pi\pi^*$ (C $\rightarrow$ C*) | 5.25 (0.070)  | $1\pi\pi^*$ (G $\rightarrow$ G*)    | 4.66 (0.006)  | $1\pi\pi^*$ (G $\rightarrow$ C*)               | 5.25 (0.064)  | $1\pi\pi^*$ (C $\rightarrow$ C*) |
| S <sub>3</sub>  | 5.76 (0.465)  | $1\pi\pi^*$ (G $\rightarrow$ G*) | 5.33 (0.095)  | $1\pi\pi^*$ (C $\rightarrow$ C*)    | 4.78 (0.000)  | $1\pi\pi^*$ (G $\rightarrow$ C*)               | 5.46 (0.019)  | $1\pi\pi^*$ (G $\rightarrow$ C*) |
| S <sub>4</sub>  | 5.78 (0.001)  | $1\pi\pi^*$ (C $\rightarrow$ C*) | 5.69 (0.418)  | $1\pi\pi^*$ (G $\rightarrow$ G*)    | 4.93 (0.087)  | $1\pi\pi^*$ (G $\rightarrow$ G*)               | 5.70 (0.001)  | $1\pi\pi^*$ (C $\rightarrow$ C*) |
| S <sub>5</sub>  | 5.92 (0.050)  | $1\pi\pi^*$ (G $\rightarrow$ C*) | 5.75 (0.001)  | $1\pi\pi^*$ (C $\rightarrow$ C*)    | 4.96 (0.024)  | $1\pi\pi^*$ (C $\rightarrow$ C*)               | 5.72 (0.216)  | $1\pi\pi^*$ (C $\rightarrow$ C*) |
| S <sub>6</sub>  | 5.94 (0.000)  | $1\pi\pi^*$ (G $\rightarrow$ G*) | 5.86 (0.105)  | $1\pi\pi^*$ (C $\rightarrow$ C*)    | 5.13 (0.036)  | $1\pi\pi^*$ (GC $\rightarrow$ C*) <sup>a</sup> | 5.82 (0.448)  | $1\pi\pi^*$ (G $\rightarrow$ G*) |
| S <sub>7</sub>  | 5.99 (0.068)  | $1\pi\pi^*$ (C $\rightarrow$ C*) | 5.99 (0.000)  | $1\pi\pi^*$ (G $\rightarrow$ G*)    | 5.14 (0.000)  | $1\pi\pi^*$ (G $\rightarrow$ C*)               | 5.97 (0.001)  | $1\pi\pi^*$ (C $\rightarrow$ C*) |
| S <sub>8</sub>  | 6.35 (0.002)  | $1\pi\pi^*$ (G $\rightarrow$ G*) | 6.26 (0.001)  | $1\pi\pi^*$ (G $\rightarrow$ C*)    | 5.33 (0.000)  | $1\pi\sigma^*$ (G $\rightarrow$ C*)            | 6.05 (0.000)  | $1\pi\pi^*$ (G $\rightarrow$ G*) |
| S <sub>9</sub>  | 6.47 (0.000)  | $1\pi\pi^*$ (C $\rightarrow$ C*) | 6.38 (0.002)  | $1\pi\pi^*$ (G $\rightarrow$ G*)    | 5.34 (0.247)  | $1\pi\pi^*$ (G $\rightarrow$ G*)               | 6.60 (0.000)  | $1\pi\pi^*$ (G $\rightarrow$ G*) |
| S <sub>10</sub> | 6.56 (0.000)  | $1\pi\pi^*$ (G $\rightarrow$ G*) | 6.53 (0.000)  | $1\pi\pi^*$ (C $\rightarrow$ C*)    | 5.41 (0.102)  | $1\pi\pi^*$ (C $\rightarrow$ C*)               | 6.61 (0.002)  | $1\pi\pi^*$ (G $\rightarrow$ G*) |
| G monomer       |               |                                  |               |                                     |               |                                                |               |                                  |
| S <sub>1</sub>  | 5.32 (0.149)  | $1\pi\pi^*$ (G $\rightarrow$ G*) | 5.32 (0.149)  | $1\pi\pi^*$ (G $\rightarrow$ G*)    | 5.09 (0.121)  | $1\pi\pi^*$ (G $\rightarrow$ G*)               | 5.44 (0.195)  | $1\pi\pi^*$ (G $\rightarrow$ G*) |
| S <sub>2</sub>  | 5.57 (0.000)  | $1\pi\pi^*$ (G $\rightarrow$ G*) | 5.63 (0.000)  | $1\pi\pi^*$ (G $\rightarrow$ G*)    | 5.36 (0.001)  | $1\pi\sigma^*$ (G $\rightarrow$ G*)            | 5.80 (0.001)  | $1\pi\pi^*$ (G $\rightarrow$ G*) |
| S <sub>3</sub>  | 5.89 (0.332)  | $1\pi\pi^*$ (G $\rightarrow$ G*) | 5.79 (0.308)  | $1\pi\pi^*$ (G $\rightarrow$ G*)    | 5.39 (0.234)  | $1\pi\pi^*$ (G $\rightarrow$ G*)               | 6.03 (0.309)  | $1\pi\pi^*$ (G $\rightarrow$ G*) |
| S <sub>4</sub>  | 6.43 (0.004)  | $1\pi\pi^*$ (G $\rightarrow$ G*) | 6.20 (0.001)  | $1\pi\sigma^*$ (G $\rightarrow$ G*) | 5.41 (0.000)  | $1\pi\pi^*$ (G $\rightarrow$ G*)               | 6.58 (0.000)  | $1\pi\pi^*$ (G $\rightarrow$ G*) |
| C monomer       |               |                                  |               |                                     |               |                                                |               |                                  |
| S <sub>1</sub>  | 5.09 (0.063)  | $1\pi\pi^*$ (C $\rightarrow$ C*) | 5.08 (0.058)  | $1\pi\pi^*$ (C $\rightarrow$ C*)    | 4.75 (0.033)  | $1\pi\pi^*$ (C $\rightarrow$ C*)               | 5.05 (0.049)  | $1\pi\pi^*$ (C $\rightarrow$ C*) |
| S <sub>2</sub>  | 5.30 (0.001)  | $1\pi\pi^*$ (C $\rightarrow$ C*) | 5.35 (0.001)  | $1\pi\pi^*$ (C $\rightarrow$ C*)    | 4.81 (0.000)  | $1\pi\pi^*$ (C $\rightarrow$ C*)               | 5.23 (0.000)  | $1\pi\pi^*$ (C $\rightarrow$ C*) |
| S <sub>3</sub>  | 5.96 (0.000)  | $1\pi\pi^*$ (C $\rightarrow$ C*) | 5.97 (0.000)  | $1\pi\pi^*$ (C $\rightarrow$ C*)    | 5.21 (0.001)  | $1\pi\pi^*$ (C $\rightarrow$ C*)               | 5.59 (0.002)  | $1\pi\pi^*$ (C $\rightarrow$ C*) |
| S <sub>4</sub>  | 6.15 (0.136)  | $1\pi\pi^*$ (C $\rightarrow$ C*) | 6.07 (0.117)  | $1\pi\pi^*$ (C $\rightarrow$ C*)    | 5.57 (0.080)  | $1\pi\pi^*$ (C $\rightarrow$ C*)               | 5.98 (0.169)  | $1\pi\pi^*$ (C $\rightarrow$ C*) |

<sup>a</sup>  $\pi$  orbital is delocalized on the G and C moieties.

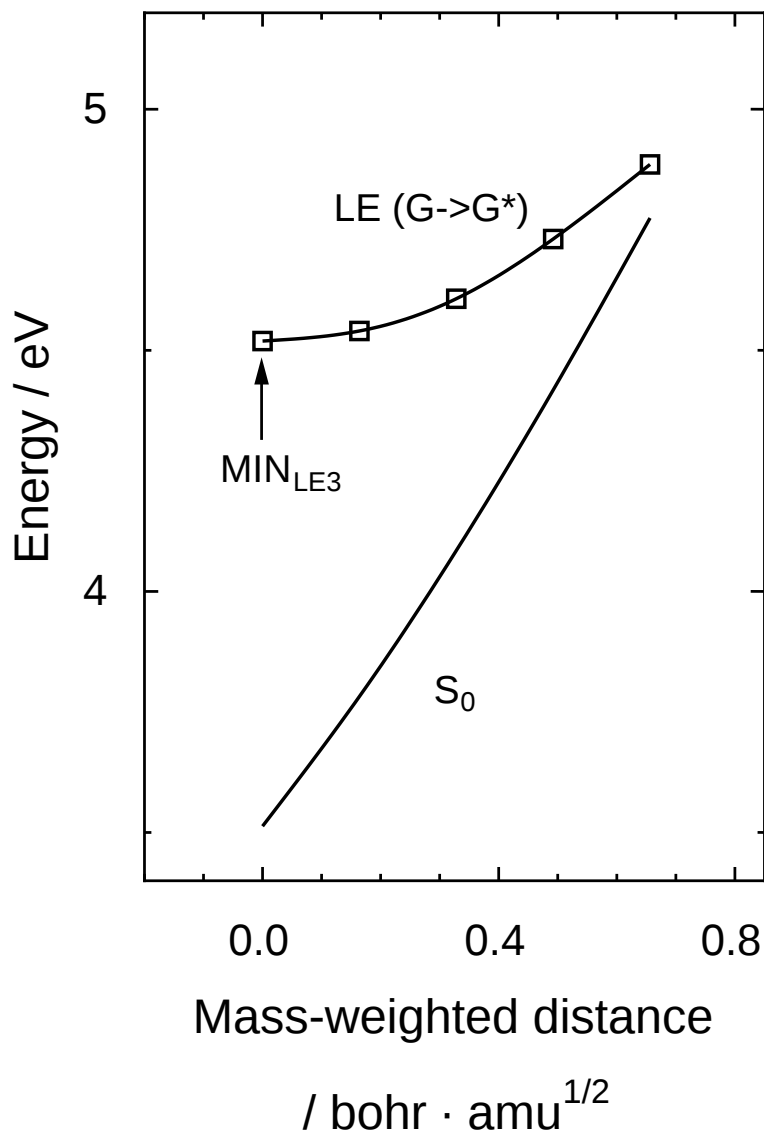

Figure S1: (TD-)LC-BLYP/DZP potential energy curves of the LE ( $G \rightarrow G^*$ ) and  $S_0$  states starting with  $\text{MIN}_{\text{LE3}}$ , along the vector of gradient difference between these states calculated at the minimum structure. Energies are relative to the ground-state energy of the FC geometry.

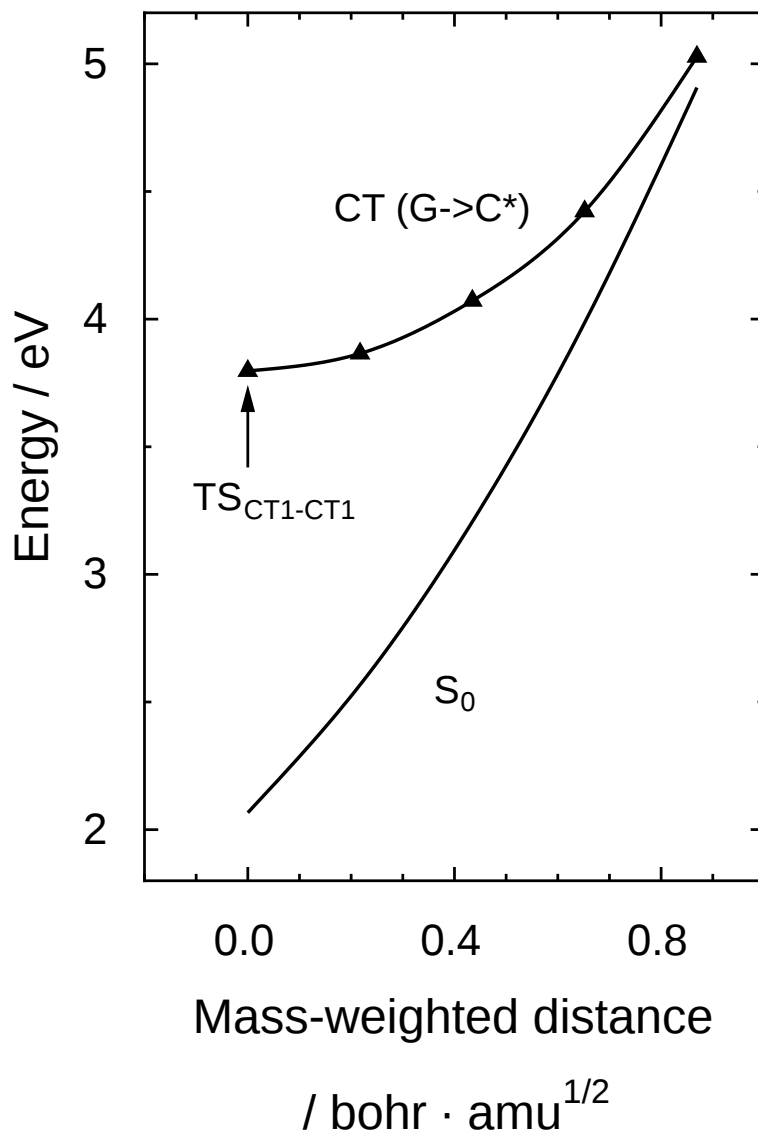

Figure S2: (TD-)LC-BLYP/DZP potential energy curves of the CT (G → C\*) and S<sub>0</sub> states starting with TS<sub>CT1-CT1</sub>, along the vector of gradient difference between these states calculated at the transition-state structure. Energies are relative to the ground-state energy of the FC geometry.
